# Supplementary material
Source: PubMed Central journal article supplement (PMC8783663)
Supplement: NIHMS1771316-supplement-1.pdf [file NIHMS1771316-supplement-1.pdf]

**Table S1.** Education Main Effects and the Interaction Effects between Education and Race-Sex Groups on Short Sleep, the NHIS 2004-2018.

|                                                      |                   | <b>Model A</b>     | <b>Model B</b>     | <b>Model C</b>     |
|------------------------------------------------------|-------------------|--------------------|--------------------|--------------------|
| <b>Intercept</b>                                     |                   | -0.826 (0.021) *** | -0.942 (0.020) *** | -0.835 (0.025) *** |
| <b>Education<br/>(Ref: HS)</b>                       | <HS               | 0.103 (0.020) ***  |                    | 0.082 (0.033) *    |
|                                                      | SCol              | 0.033 (0.014) *    |                    | 0.003 (0.022)      |
|                                                      | Col               | -0.386 (0.014) *** |                    | -0.388 (0.022) *** |
| <b>Race-Sex Group<br/>(Ref: White Men)</b>           | Black Men         |                    | 0.361 (0.022) ***  | 0.114 (0.039) **   |
|                                                      | Black Women       |                    | 0.369 (0.018) ***  | 0.103 (0.036) **   |
|                                                      | White Women       |                    | -0.069 (0.012) *** | -0.035 (0.023)     |
| <b>Race-Sex<br/>by<br/>Education<br/>Interaction</b> | Black Men, <HS    |                    |                    | -0.213 (0.071) **  |
|                                                      | Black Women, <HS  |                    |                    | -0.040 (0.061)     |
|                                                      | White Women, <HS  |                    |                    | 0.105 (0.046) *    |
|                                                      | Black Men, SCol   |                    |                    | 0.309 (0.055) ***  |
|                                                      | Black Women, SCol |                    |                    | 0.272 (0.047) ***  |
|                                                      | White Women, SCol |                    |                    | -0.022 (0.031)     |
|                                                      | Black Men, Col    |                    |                    | 0.605 (0.063) ***  |
|                                                      | Black Women, Col  |                    |                    | 0.554 (0.053) ***  |
|                                                      | White Women, Col  |                    |                    | -0.097 (0.031) **  |

Note: Table figures are weighted logistic regression coefficient estimates. All models adjust for age and period patterns. Model A includes only the main effects of education. Model B includes only the main effects of race-sex groups. Model C includes the two main effects and their interactions. Age and period estimates are omitted for ease of presentation and available upon request. <HS: less than high school; HS: high school; SCol: some college; Col: college. \*: p<0.5; \*\*: p<0.1; \*\*\*: p<0.001.

Table S2. Logistic regression models results, before and after adjusting for social and demographic factors, the NHIS 2004-2018.

|                                  | Black Men              |                    |                    | Black Women        |                    |                    | White Men          |                    |                    | White Women        |                    |                    |
|----------------------------------|------------------------|--------------------|--------------------|--------------------|--------------------|--------------------|--------------------|--------------------|--------------------|--------------------|--------------------|--------------------|
|                                  | Model 1                | Model 2            | Model 3            | Model 1            | Model 2            | Model 3            | Model 1            | Model 2            | Model 3            | Model 1            | Model 2            | Model 3            |
| <b>Intercept</b>                 | -0.781 (0.077) ***     | -0.864 (0.092) *** | -1.346 (0.209) *** | -0.788 (0.059) *** | -0.739 (0.067) *** | -1.391 (0.150) *** | -0.755 (0.034) *** | -0.768 (0.041) *** | -1.777 (0.087) *** | -0.933 (0.032) *** | -0.948 (0.036) *** | -2.203 (0.070) *** |
| <b>Education</b>                 | <HS -0.139 (0.063) *   | -0.115 (0.064)     | -0.123 (0.073)     | 0.032 (0.051)      | 0.027 (0.052)      | -0.003 (0.061)     | 0.084 (0.033) *    | 0.098 (0.033) **   | 0.030 (0.038)      | 0.186 (0.032) ***  | 0.192 (0.032) ***  | 0.060 (0.039)      |
| <b>(Ref: HS)</b>                 | SCol 0.312 (0.051) *** | 0.268 (0.051) ***  | 0.245 (0.058) ***  | 0.281 (0.041) ***  | 0.275 (0.042) ***  | 0.222 (0.049) ***  | 0.004 (0.022)      | -0.007 (0.023)     | 0.018 (0.025)      | -0.017 (0.021)     | -0.025 (0.021)     | 0.019 (0.025)      |
|                                  | Col 0.221 (0.059) ***  | 0.145 (0.060) *    | 0.159 (0.078) *    | 0.173 (0.049) ***  | 0.155 (0.050) **   | 0.162 (0.067) *    | -0.385 (0.022) *** | -0.419 (0.023) *** | -0.279 (0.029) *** | -0.482 (0.022) *** | -0.523 (0.022) *** | -0.300 (0.029) *** |
| <b>Employment</b>                | Unemployed             | -0.171 (0.089)     | -0.145 (0.101)     |                    | -0.100 (0.070)     | -0.202 (0.080) *   |                    | -0.060 (0.050)     | -0.109 (0.055) *   |                    | 0.156 (0.048) ***  | 0.040 (0.052)      |
| <b>(Ref: Not in the LF)</b>      | Employed               | -0.058 (0.148)     | 0.083 (0.166)      |                    | -0.211 (0.113)     | -0.100 (0.132)     |                    | -0.055 (0.071)     | 0.004 (0.076)      |                    | -0.246 (0.064) *** | -0.164 (0.071) *   |
| <b>Work Hours</b>                | 1-34 hours             | 0.159 (0.160)      | 0.012 (0.178)      |                    | 0.187 (0.120)      | -0.012 (0.138)     |                    | -0.028 (0.076)     | -0.052 (0.082)     |                    | 0.171 (0.067) *    | 0.114 (0.074)      |
| <b>(Ref=Not working)</b>         | 35-49 hours            | 0.127 (0.151)      | -0.017 (0.168)     |                    | 0.117 (0.115)      | -0.013 (0.134)     |                    | -0.038 (0.072)     | -0.042 (0.077)     |                    | 0.235 (0.066) ***  | 0.235 (0.073) **   |
|                                  | 50 hours +             | 0.503 (0.157) **   | 0.359 (0.177) *    |                    | 0.598 (0.129) ***  | 0.447 (0.149) **   |                    | 0.380 (0.073) ***  | 0.385 (0.079) ***  |                    | 0.733 (0.069) ***  | 0.744 (0.077) ***  |
| <b>Income</b>                    | < \$35,000             |                    | 0.077 (0.059)      |                    |                    | 0.039 (0.049)      |                    |                    | 0.053 (0.027) *    |                    |                    | 0.197 (0.026) ***  |
| <b>(Ref: 35K-75K)</b>            | >= \$75,000            |                    | 0.066 (0.067)      |                    |                    | -0.092 (0.065)     |                    |                    | -0.116 (0.024) *** |                    |                    | -0.135 (0.024) *** |
|                                  | Laborer                |                    | -0.037 (0.070)     |                    |                    | -0.135 (0.050) **  |                    |                    | 0.038 (0.026)      |                    |                    | 0.038 (0.022)      |
|                                  | Service                |                    | -0.029 (0.072)     |                    |                    | -0.176 (0.071) *   |                    |                    | 0.120 (0.027) ***  |                    |                    | 0.308 (0.039) ***  |
| <b>Home Ownership (Ref: Own)</b> |                        |                    | 0.120 (0.052) *    |                    |                    | 0.091 (0.044) *    |                    |                    | 0.147 (0.024) ***  |                    |                    | 0.195 (0.024) ***  |
| <b>Marital Status</b>            | Formerly married       |                    | 0.156 (0.067) *    |                    |                    | 0.158 (0.053) **   |                    |                    | 0.340 (0.029) ***  |                    |                    | 0.354 (0.026) ***  |
| <b>(Ref: Married)</b>            | Never married          |                    | -0.016 (0.070)     |                    |                    | 0.087 (0.055)      |                    |                    | -0.012 (0.032)     |                    |                    | 0.114 (0.033) ***  |
| <b>Family Size</b>               |                        |                    | 0.039 (0.021)      |                    |                    | 0.071 (0.015) ***  |                    |                    | 0.069 (0.009) ***  |                    |                    | 0.136 (0.009) ***  |
| <b>BMI</b>                       |                        |                    | 0.013 (0.005) **   |                    |                    | 0.019 (0.003) ***  |                    |                    | 0.024 (0.002) ***  |                    |                    | 0.020 (0.002) ***  |

Note: Table figures are weighted logistic regression coefficient estimates. Numbers in parenthesis are standard errors. Model 1: adjusted for age and time periods. Model 2: adjusted for age, time periods, work hours and employment status. Model 3: adjusted for age, time periods, socioeconomic variables, family- and health-related factors. <HS: less than high school; HS: high school; SCol: some college; Col: college or more. \*, p<0.5; \*\*, p<0.1; \*\*\*, p<0.001.

**Table S3.** Age and period patterns by education level for each race-sex group, the NHIS 2004-2018.

|           |         | Black Men |          |        |           |        |           |        |           |
|-----------|---------|-----------|----------|--------|-----------|--------|-----------|--------|-----------|
|           |         | <HS       |          | HS     |           | SCol   |           | Col    |           |
| Intercept |         | -0.573    | 0.204 ** | -0.921 | 0.127 *** | -0.411 | 0.117 *** | -0.599 | 0.162 *** |
|           | 30      | -0.359    | 0.258    | 0.448  | 0.153 **  | 0.085  | 0.148     | 0.194  | 0.187     |
| Age       | 35      | -0.354    | 0.272    | 0.340  | 0.161 *   | 0.222  | 0.143     | 0.384  | 0.189 *   |
|           | 40      | -0.264    | 0.252    | 0.279  | 0.148     | 0.218  | 0.146     | 0.255  | 0.193     |
|           | 45      | -0.351    | 0.239    | 0.310  | 0.149 *   | 0.267  | 0.146     | 0.366  | 0.192     |
|           | 50      | -0.089    | 0.234    | 0.222  | 0.150     | 0.108  | 0.141     | 0.598  | 0.196 **  |
|           | 55      | 0.000     | 0.226    | 0.199  | 0.151     | 0.175  | 0.149     | 0.123  | 0.200     |
|           | 60      | -0.079    | 0.232    | -0.080 | 0.165     | -0.231 | 0.156     | 0.211  | 0.207     |
|           | 65      | -0.654    | 0.229 ** | 0.096  | 0.167     | -0.334 | 0.160 *   | -0.262 | 0.221     |
| Period    | 2008-10 | 0.038     | 0.151    | 0.244  | 0.104 *   | 0.057  | 0.105     | -0.055 | 0.141     |
|           | 2011-14 | 0.204     | 0.126    | 0.204  | 0.090 *   | 0.218  | 0.092 *   | 0.139  | 0.124     |
|           | 2015-18 | 0.262     | 0.150    | 0.372  | 0.103 *** | 0.242  | 0.104 *   | 0.232  | 0.134     |

  

|           |         | Black Women |           |        |           |        |           |        |           |
|-----------|---------|-------------|-----------|--------|-----------|--------|-----------|--------|-----------|
|           |         | <HS         |           | HS     |           | SCol   |           | Col    |           |
| Intercept |         | -0.873      | 0.130 *** | -0.884 | 0.105 *** | -0.442 | 0.083 *** | -0.595 | 0.124 *** |
|           | 30      | 0.101       | 0.171     | 0.265  | 0.134 *   | 0.153  | 0.099     | 0.113  | 0.150     |
| Age       | 35      | 0.393       | 0.183 *   | 0.232  | 0.135     | 0.142  | 0.102     | 0.242  | 0.144     |
|           | 40      | 0.350       | 0.187     | 0.232  | 0.134     | 0.094  | 0.105     | 0.308  | 0.147 *   |
|           | 45      | 0.386       | 0.168 *   | 0.196  | 0.130     | 0.212  | 0.106 *   | 0.163  | 0.153     |
|           | 50      | 0.420       | 0.165 *   | 0.306  | 0.129 *   | 0.063  | 0.108     | 0.211  | 0.155     |
|           | 55      | 0.494       | 0.164 **  | 0.417  | 0.132 **  | 0.211  | 0.111     | 0.129  | 0.157     |
|           | 60      | 0.263       | 0.162     | 0.286  | 0.141 *   | -0.146 | 0.118     | -0.094 | 0.164     |
|           | 65      | 0.079       | 0.159     | -0.244 | 0.144     | -0.316 | 0.122 **  | -0.229 | 0.171     |
| Period    | 2008-10 | -0.067      | 0.114     | -0.081 | 0.090     | 0.069  | 0.079     | 0.120  | 0.111     |
|           | 2011-14 | 0.092       | 0.100     | 0.205  | 0.079 **  | 0.187  | 0.069 **  | 0.157  | 0.094     |
|           | 2015-18 | 0.285       | 0.120 *   | 0.451  | 0.090 *** | 0.254  | 0.076 *** | 0.250  | 0.103 *   |

  

|           |         | White Men |           |        |           |        |           |        |           |
|-----------|---------|-----------|-----------|--------|-----------|--------|-----------|--------|-----------|
|           |         | <HS       |           | HS     |           | SCol   |           | Col    |           |
| Intercept |         | -0.700    | 0.102 *** | -0.737 | 0.059 *** | -0.683 | 0.053 *** | -1.228 | 0.059 *** |
|           | 30      | -0.012    | 0.131     | 0.015  | 0.073     | 0.082  | 0.064     | 0.264  | 0.066 *** |
| Age       | 35      | 0.068     | 0.134     | 0.144  | 0.073 *   | 0.179  | 0.063 **  | 0.381  | 0.067 *** |
|           | 40      | 0.294     | 0.129 *   | 0.141  | 0.071 *   | 0.135  | 0.064 *   | 0.263  | 0.066 *** |
|           | 45      | 0.213     | 0.122     | 0.150  | 0.069 *   | 0.112  | 0.063     | 0.287  | 0.067 *** |
|           | 50      | 0.041     | 0.121     | -0.002 | 0.069     | 0.006  | 0.064     | 0.360  | 0.068 *** |
|           | 55      | 0.125     | 0.121     | -0.045 | 0.070     | -0.076 | 0.063     | 0.196  | 0.068 **  |
|           | 60      | -0.137    | 0.123     | -0.330 | 0.072 *** | -0.233 | 0.065 *** | -0.018 | 0.068     |
|           | 65      | -0.463    | 0.124 *** | -0.532 | 0.078 *** | -0.502 | 0.071 *** | -0.300 | 0.073 *** |
| Period    | 2008-10 | 0.065     | 0.084     | 0.057  | 0.049     | -0.036 | 0.047     | -0.093 | 0.048     |
|           | 2011-14 | 0.150     | 0.072 *   | 0.147  | 0.043 *** | 0.107  | 0.041 *   | 0.013  | 0.042     |
|           | 2015-18 | 0.219     | 0.079 **  | 0.318  | 0.045 *** | 0.185  | 0.042 *** | 0.178  | 0.042 *** |

  

|           |         | White Women |           |        |           |        |           |        |           |
|-----------|---------|-------------|-----------|--------|-----------|--------|-----------|--------|-----------|
|           |         | <HS         |           | HS     |           | SCol   |           | Col    |           |
| Intercept |         | -0.786      | 0.095 *** | -1.017 | 0.066 *** | -0.861 | 0.047 *** | -1.438 | 0.050 *** |
|           | 30      | 0.217       | 0.122     | 0.256  | 0.080 **  | 0.211  | 0.057 *** | 0.328  | 0.058 *** |
| Age       | 35      | 0.089       | 0.129     | 0.228  | 0.080 **  | 0.130  | 0.058 *   | 0.238  | 0.059 *** |
|           | 40      | 0.151       | 0.129     | 0.326  | 0.078 *** | 0.039  | 0.058     | 0.202  | 0.060 *** |
|           | 45      | 0.306       | 0.121 *   | 0.225  | 0.076 **  | 0.117  | 0.058 *   | 0.309  | 0.061 *** |
|           | 50      | 0.381       | 0.119 **  | 0.369  | 0.073 *** | 0.086  | 0.057     | 0.323  | 0.060 *** |
|           | 55      | 0.333       | 0.117 **  | 0.214  | 0.074 **  | -0.034 | 0.057     | 0.280  | 0.062 *** |
|           | 60      | 0.093       | 0.114     | -0.118 | 0.074     | -0.173 | 0.059 **  | 0.109  | 0.064     |
|           | 65      | -0.031      | 0.113     | -0.136 | 0.075     | -0.406 | 0.063 *** | -0.096 | 0.069     |
| Period    | 2008-10 | 0.088       | 0.080     | 0.134  | 0.047 **  | 0.100  | 0.042 *   | -0.047 | 0.047     |
|           | 2011-14 | 0.097       | 0.072     | 0.201  | 0.043 *** | 0.184  | 0.037 *** | 0.105  | 0.040 **  |
|           | 2015-18 | 0.226       | 0.077 **  | 0.389  | 0.045 *** | 0.352  | 0.038 *** | 0.278  | 0.040 *** |

Note: Table figures are weighted logistic regression coefficient estimates. Numbers in parenthesis are standard errors.  
 <HS: less than high school; HS: high school; SCol: some college; Col: college or more. \*, p<0.5; \*\*, p<0.1; \*\*\*, p<0.001.
